# Supplementary material for: Digitally programmable microfluidic automaton for multiscale combinatorial mixing and sample processing
Source: Royal Society of Chemistry journal article supplement (doi:10.1039/c2lc40861a), 2012-10-31
Supplement: c2lc40861a.pdf [file c2lc40861a.pdf]

## S1. Full Program for Figure 1B

```
main
call cycle 100 <calls the function "cycle" 100 times>
end

cycle
open(C1)
open(D1)
call wait
open(C2)
call wait
close(C1)
close(D1)
call wait
open(B1)
call wait
close(C2)
call wait
close(B1)
call wait
end

wait
w250 <waits for 250 ms before proceeding to the next step>
end
```

B2 is fluttered continuously in a separate program that runs simultaneously.

## S2. Program 1: Mixing program illustrated in Figure 4

|                  |                                     |
|------------------|-------------------------------------|
| F(A3)            | Flutter valve A3                    |
| [C(d2,d4 → C3)   | Combine fluorescein and ROX in C3   |
| T((C3 → a1)1]250 | Transfer to a1 and repeat 250 times |

## S3. Program 2: Serial dilution program illustrated in Figure 5

|                                               |                                         |
|-----------------------------------------------|-----------------------------------------|
| Out 1: [C(c1, d2 → B2, C2), T(B2,C2 → b1)2]60 | Combine dye and buffer to produce Out1  |
| Out 2: [C(b1, d2 → B2, C2), T(B2,C2 → a1)2]60 | Combine Out1 and buffer to produce Out2 |
| Out 3: [C(a1, d2 → B2, B3), T(B2,B3 → d3)2]60 | Combine Out2 and buffer to produce Out3 |
| Out 4: [C(d3, d2 → B3, B4), T(B3,B4 → d4)2]60 | Combine Out3 and buffer to produce Out4 |

## S4. Program 3: CZE sample preparation program illustrated in Figure 6

|                  |                                                       |
|------------------|-------------------------------------------------------|
| [C(c1,d2,d4→ C2) | Combine EDC, Cascade Blue, and sample.                |
| T((C2 → a1)1]250 | Transfer to Output 1.                                 |
| Store 15 min     |                                                       |
| [C(a1,d2→ B2,B3) | Combine one unit buffer and one unit reacted product. |
| T(B2,B3 → b1)2   | Transfer to Output 2.                                 |
| T(d3→b1)1]250    | Transfer 1 unit buffer to Output 2.                   |

### S.5 Proportions Loaded to the Combining Valve in the 6-bit Combinatorial Mixing Device for Inputs 1-3

| Binary Sequence | %Input 1 | %Input 2 | %Input 3 | Binary Sequence | %Input 1 | %Input 2 | %Input 3 |
|-----------------|----------|----------|----------|-----------------|----------|----------|----------|
| 100000          | 100      | 0        | 0        | 100001          | 52       | 0        | 0        |
| 010000          | 0        | 100      | 0        | 010001          | 0        | 56       | 0        |
| 110000          | 48       | 52       | 0        | 110001          | 32       | 32       | 0        |
| 001000          | 0        | 0        | 100      | 001001          | 0        | 0        | 54       |
| 101000          | 49       | 0        | 50       | 101001          | 35       | 0        | 16       |
| 011000          | 0        | 52       | 47       | 011001          | 0        | 38       | 31       |
| 111000          | 33       | 34       | 30       | 111001          | 22       | 24       | 22       |
| 000100          | 0        | 0        | 0        | 000101          | 0        | 0        | 0        |
| 100100          | 38       | 0        | 0        | 100101          | 32       | 0        | 0        |
| 010100          | 0        | 54       | 0        | 010101          | 0        | 39       | 0        |
| 110100          | 22       | 33       | 0        | 110101          | 28       | 25       | 0        |
| 001100          | 0        | 0        | 38       | 001101          | 27       | 0        | 0        |
| 101100          | 22       | 0        | 20       | 101101          | 30       | 0        | 25       |
| 011100          | 0        | 39       | 24       | 011101          | 0        | 38       | 21       |
| 111100          | 22       | 30       | 20       | 111101          | 21       | 22       | 12       |
| 000010          | 0        | 0        | 0        | 000011          | 0        | 0        | 0        |
| 100010          | 48       | 0        | 0        | 100011          | 27       | 0        | 0        |
| 010010          | 0        | 63       | 0        | 010011          | 0        | 36       | 0        |
| 110001          | 30       | 43       | 0        | 110011          | 21       | 22       | 0        |
| 001010          | 0        | 0        | 35       | 001011          | 0        | 0        | 40       |
| 101010          | 36       | 0        | 24       | 101011          | 23       | 0        | 15       |
| 011010          | 0        | 53       | 28       | 011011          | 0        | 38       | 21       |
| 111010          | 16       | 40       | 16       | 111011          | 20       | 20       | 11       |
| 000110          | 0        | 0        | 0        | 000111          | 0        | 0        | 0        |
| 100110          | 32       | 0        | 0        | 100111          | 26       | 0        | 0        |
| 010110          | 0        | 47       | 0        | 010111          | 0        | 36       | 0        |
| 110110          | 28       | 29       | 0        | 110111          | 24       | 21       | 0        |
| 001110          | 0        | 0        | 32       | 001111          | 0        | 0        | 25       |
| 101110          | 28       | 0        | 24       | 101111          | 23       | 0        | 17       |
| 011110          | 0        | 38       | 21       | 011111          | 0        | 33       | 20       |
| 111110          | 20       | 18       | 12       | 111111          | 19       | 25       | 11       |
| 000001          | 0        | 0        | 0        | 000000          | 0        | 0        | 0        |
